# Supplementary material
Source: PubMed Central journal article supplement (PMC5860835)
Supplement: DC172233SupplementaryData.pdf [file DC172233SupplementaryData.pdf]

SUPPLEMENTARY DATA

**Supplementary Table 1.** Adjusted odds ratios (OR) and 95% confidence intervals (CI) for the presence of adverse left ventricular structural outcomes and subclinical systolic and diastolic dysfunction according to the duration of diabetes during follow-up, The CARDIA Study.

|                                                           | Duration of diabetes (years) |                   |                   |                    |                   | <i>p</i> -trend | Per each additional 5 years |
|-----------------------------------------------------------|------------------------------|-------------------|-------------------|--------------------|-------------------|-----------------|-----------------------------|
|                                                           | 0                            | 1-5               | 6-10              | 11-15              | >15               |                 |                             |
| <u>Structural outcomes</u>                                |                              |                   |                   |                    |                   |                 |                             |
| Left ventricular hypertrophy*                             |                              |                   |                   |                    |                   |                 |                             |
| No. of cases                                              | 595                          | 51                | 56                | 17                 | 27                |                 |                             |
| Prevalence (%)                                            | 24.1                         | 44.4              | 41.8              | 36.2               | 48.2              |                 |                             |
| OR (95% CI) <sup>†</sup>                                  | 1 [Ref]                      | 1.22 (0.78, 1.90) | 0.93 (0.60, 1.43) | 0.55 (0.28, 1.07)  | 1.27 (0.69, 2.33) | .86             | 0.99 (0.88, 1.11)           |
| Concentric remodeling <sup>‡</sup>                        |                              |                   |                   |                    |                   |                 |                             |
| No. of cases                                              | 343                          | 25                | 33                | 10                 | 9                 |                 |                             |
| Prevalence (%)                                            | 13.9                         | 21.7              | 24.6              | 21.7               | 16.1              |                 |                             |
| OR (95% CI) <sup>†</sup>                                  | 1 [Ref]                      | 1.12 (0.69, 1.82) | 1.36 (0.87, 2.12) | 1.01 (0.48, 2.12)  | 0.77 (0.36, 1.63) | .82             | 1.01 (0.90, 1.12)           |
| <u>Systolic dysfunction</u>                               |                              |                   |                   |                    |                   |                 |                             |
| Ejection fraction <55%                                    |                              |                   |                   |                    |                   |                 |                             |
| No. of cases                                              | 69                           | 4                 | 9                 | 5                  | 4                 |                 |                             |
| Prevalence (%)                                            | 2.8                          | 3.5               | 6.7               | 10.6               | 7.1               |                 |                             |
| OR (95% CI) <sup>†</sup>                                  | 1 [Ref]                      | 1.25 (0.43, 3.66) | 2.64 (1.20, 5.78) | 3.92 (1.39, 11.08) | 2.23 (0.74, 6.78) | .01             | 1.30 (1.07, 1.59)           |
| Longitudinal strain >90 <sup>th</sup> percentile (-12.3%) |                              |                   |                   |                    |                   |                 |                             |
| No. of cases                                              | 240                          | 23                | 34                | 11                 | 11                |                 |                             |
| Prevalence (%)                                            | 9.9                          | 20.2              | 26.4              | 24.4               | 22.5              |                 |                             |
| OR (95% CI) <sup>†</sup>                                  | 1 [Ref]                      | 1.32 (0.79, 2.20) | 1.90 (1.19, 3.03) | 1.47 (0.70, 3.10)  | 1.70 (0.83, 3.50) | .005            | 1.20 (1.06, 1.36)           |
| <u>Diastolic dysfunction</u>                              |                              |                   |                   |                    |                   |                 |                             |
| Impaired relaxation <sup>§</sup>                          |                              |                   |                   |                    |                   |                 |                             |
| No. of cases                                              | 586                          | 62                | 55                | 17                 | 23                |                 |                             |
| Prevalence (%)                                            | 21.8                         | 46.3              | 36.0              | 31.5               | 38.3              |                 |                             |
| OR (95% CI) <sup>†</sup>                                  | 1 [Ref]                      | 1.87 (1.28, 2.73) | 1.30 (0.88, 1.91) | 1.01 (0.55, 1.88)  | 1.58 (0.89, 2.81) | .02             | 1.13 (1.02, 1.26)           |
| Increased filling pressure <sup>  </sup>                  |                              |                   |                   |                    |                   |                 |                             |
| No. of cases                                              | 226                          | 34                | 37                | 7                  | 14                |                 |                             |
| Prevalence (%)                                            | 8.5                          | 26.0              | 24.2              | 13.2               | 23.7              |                 |                             |
| OR (95% CI) <sup>†</sup>                                  | 1 [Ref]                      | 2.10 (1.32, 3.35) | 1.90 (1.20, 3.01) | 0.62 (0.26, 1.49)  | 1.66 (0.83, 3.33) | .02             | 1.16 (1.02, 1.31)           |

\*Left ventricular mass >224 g for men and >162 g for women. <sup>†</sup>Adjusts for model 2 variables listed in the footnote of Table 3. <sup>‡</sup>Relative wall thickness >0.42. <sup>§</sup>*e'* <10 cm/s. <sup>||</sup>*E/e'* ≥12 alone or *E/e'* 8-12 and left atrial volume index ≥ 34 ml/m

SUPPLEMENTARY DATA

**Supplementary Table 2.** Adjusted odds ratios (OR) and 95% confidence intervals (CI) for the presence of adverse left ventricular structural outcomes and subclinical systolic and diastolic dysfunction according to the duration of prediabetes during follow-up, The CARDIA Study.

|                                                           | Duration of prediabetes (years) |                   |                   |                   |                   | <i>p</i> -trend | Per each additional 5 years |
|-----------------------------------------------------------|---------------------------------|-------------------|-------------------|-------------------|-------------------|-----------------|-----------------------------|
|                                                           | 0                               | 1-5               | 6-10              | 11-15             | >15               |                 |                             |
| <u>Structural outcomes</u>                                |                                 |                   |                   |                   |                   |                 |                             |
| Left ventricular hypertrophy*                             |                                 |                   |                   |                   |                   |                 |                             |
| No. of cases                                              | 297                             | 148               | 181               | 69                | 51                |                 |                             |
| Prevalence (%)                                            | 23.3                            | 23.9              | 34.4              | 30.9              | 29.1              |                 |                             |
| OR (95% CI) <sup>†</sup>                                  | 1 [Ref]                         | 0.83 (0.64, 1.08) | 1.30 (1.01, 1.69) | 1.07 (0.74, 1.53) | 1.07 (0.71, 1.60) | .15             | 1.06 (0.98, 1.15)           |
| Concentric remodeling <sup>‡</sup>                        |                                 |                   |                   |                   |                   |                 |                             |
| No. of cases                                              | 164                             | 98                | 91                | 41                | 26                |                 |                             |
| Prevalence (%)                                            | 12.9                            | 15.8              | 17.3              | 18.5              | 14.9              |                 |                             |
| OR (95% CI) <sup>†</sup>                                  | 1 [Ref]                         | 1.07 (0.80, 1.43) | 1.10 (0.82, 1.49) | 1.12 (0.75, 1.68) | 0.93 (0.58, 1.49) | .62             | 1.02 (0.93, 1.12)           |
| <u>Systolic dysfunction</u>                               |                                 |                   |                   |                   |                   |                 |                             |
| Ejection fraction <55%                                    |                                 |                   |                   |                   |                   |                 |                             |
| No. of cases                                              | 42                              | 15                | 15                | 9                 | 10                |                 |                             |
| Prevalence (%)                                            | 3.3                             | 2.4               | 2.9               | 4.0               | 5.7               |                 |                             |
| OR (95% CI) <sup>†</sup>                                  | 1 [Ref]                         | 0.64 (0.34, 1.20) | 0.75 (0.40, 1.40) | 1.01 (0.46, 2.21) | 1.56 (0.73, 3.34) | .71             | 1.03 (0.87, 1.24)           |
| Longitudinal strain >90 <sup>th</sup> percentile (-12.3%) |                                 |                   |                   |                   |                   |                 |                             |
| No. of cases                                              | 107                             | 74                | 78                | 32                | 28                |                 |                             |
| Prevalence (%)                                            | 8.7                             | 12.1              | 15.0              | 14.0              | 16.2              |                 |                             |
| OR (95% CI) <sup>†</sup>                                  | 1 [Ref]                         | 1.28 (0.92, 1.80) | 1.47 (1.05, 2.06) | 1.19 (0.75, 1.87) | 1.57 (0.97, 2.54) | .02             | 1.12 (1.02, 1.24)           |
| <u>Diastolic dysfunction</u>                              |                                 |                   |                   |                   |                   |                 |                             |
| Impaired relaxation <sup>§</sup>                          |                                 |                   |                   |                   |                   |                 |                             |
| No. of cases                                              | 257                             | 190               | 172               | 64                | 60                |                 |                             |
| Prevalence (%)                                            | 18.9                            | 27.7              | 29.4              | 25.0              | 29.6              |                 |                             |
| OR (95% CI) <sup>†</sup>                                  | 1 [Ref]                         | 1.38 (1.09, 1.74) | 1.34 (1.05, 1.72) | 1.12 (0.80, 1.58) | 1.46 (1.02, 2.10) | .006            | 1.11 (1.03, 1.19)           |
| Increased filling pressure <sup>  </sup>                  |                                 |                   |                   |                   |                   |                 |                             |
| No. of cases                                              | 104                             | 75                | 85                | 26                | 28                |                 |                             |
| Prevalence (%)                                            | 7.7                             | 11.0              | 14.6              | 10.3              | 13.9              |                 |                             |
| OR (95% CI) <sup>†</sup>                                  | 1 [Ref]                         | 1.17 (1.82, 1.65) | 1.31 (0.93, 1.85) | 0.89 (0.54, 1.48) | 1.33 (0.81, 2.20) | .13             | 1.08 (0.98, 1.20)           |

\*Left ventricular mass >224 g for men and >162 g for women. <sup>†</sup>Adjusts for model 2 variables listed in the footnote of Table 4. <sup>‡</sup>Relative wall thickness >0.42. <sup>§</sup>*e'* <10 cm/s. <sup>||</sup>*E/e'* ≥12 alone or *E/e'* 8-12 and left atrial volume index ≥ 34 ml/m.
